# Supplementary material
Source: Springer Nature journal article supplement (https://www.springermedizin.de/resource/supplementary/12875_2013_971_MOESM4_ESM.pdf/9435514)

## Prevention and Screening Actions

Percent Improvement  
Practice FacilitatorPercent Improvement  
Prevention Practitioner

1. Fasting blood sugar screening (N=255)
2. Fasting blood sugar monitoring (N=28)
3. Blood pressure screening (N=442)
4. Blood pressure monitoring (N=192)
5. Hypertension treatment (N=92)
6. Framingham calculated (N=422)
7. Framingham improved (N=80)
8. LDL improved (N=81)
9. Cholesterol treatment (N=82)
10. Breast cancer screening (N=198)
11. Colorectal cancer screening (N=226)
12. Cervical cancer screening (N=166)
13. BMI screening (N=164)
14. Waist circumference measured (N=714)
15. Weight control (N=444)
16. Weight control referral (N=446)
17. Smoking screening (N=164)
18. Smoking cessation (N=98)
19. Smoking cessation referral (N=98)
20. Alcohol screening (N=229)
21. Alcohol control (N=151)
22. Alcohol cessation referral (N=151)
23. Physical activity screening (N=686)
24. Physical activity >90 minutes/week (N=390)
25. Physical activity program referral (N=390)
26. Nutrition screening (N=459)
27. Healthy diet score improved (N=58)
28. Nutrition counseling referral (N=58)

Overall (N=777)

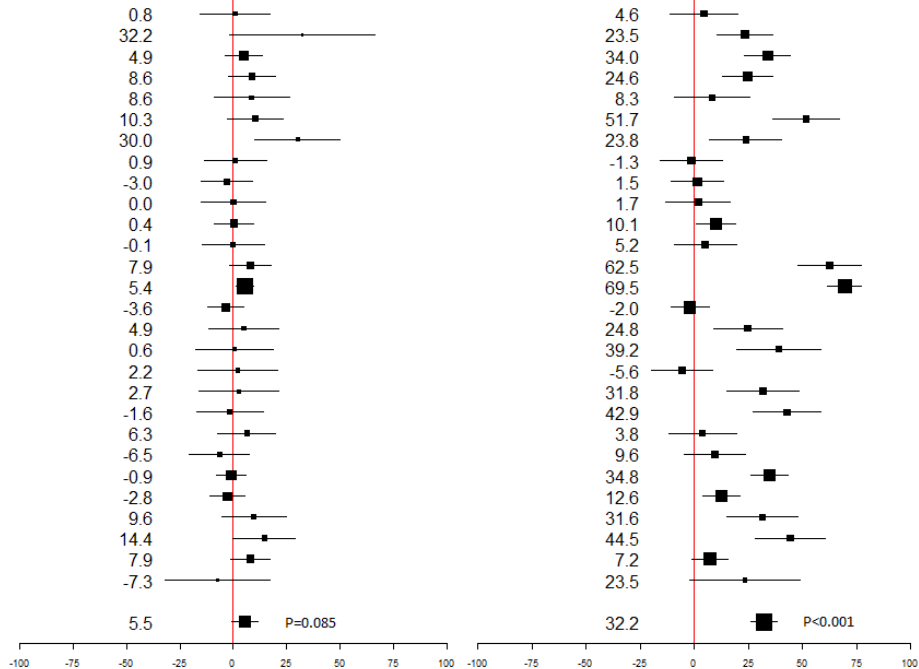

Supplement: MOESM4 [file 9435514]
